# Supplementary material
Source: publisher site journal article supplement (https://spandidos-publications.com/2792/downloadSupplementary)

Figure S1. Levels of liver injury markers serum AST and ALT in *Bmp6*<sup>-/-</sup> and WT mice at 3 and 10 months of age (n=6 mice/group). Data are presented as the mean ± SD. AST, aspartate transaminase; ALT, alanine transaminase; *Bmp6*<sup>-/-</sup>, bone morphogenetic protein 6-knockout; WT, wild-type.

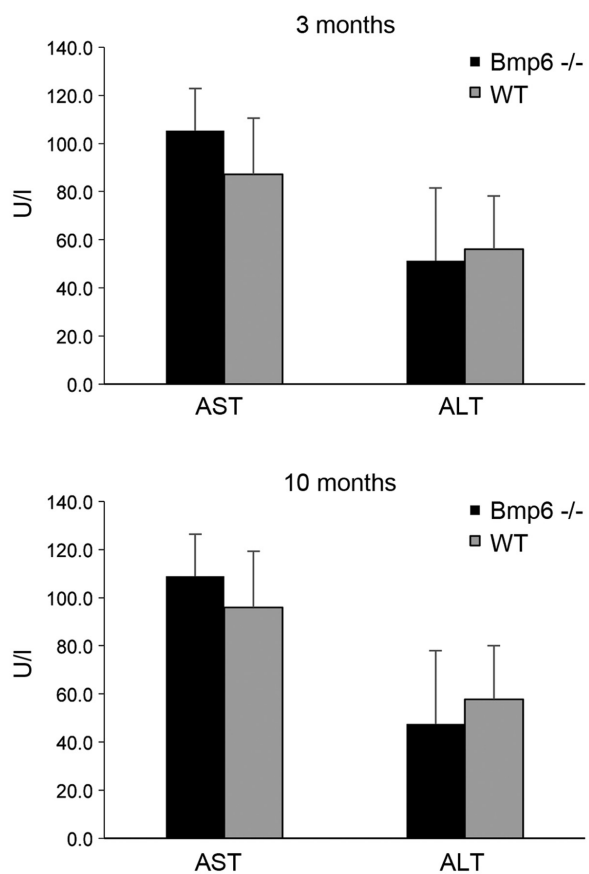

Supplement: Supplementary file 1 [file downloadSupplementary]
